# Supplementary material
Source: ML conference proceedings conference paper supplement (https://openreview.net/forum?id=mdqne0vJqj)
Supplement: supplementary_material [file Supplementary Materials for Mining Unseen Classes via Regional Objectness A Simple Baseline for Incremental Segmentation.pdf › Supplementary Materials for Mining Unseen Classes via Regional Objectness A Simple Baseline for Incremental Segmentation.pdf]

---

# Supplementary Materials for Mining Unseen Classes via Regional Objectness: A Simple Baseline for Incremental Segmentation

---

Anonymous Author(s)

Affiliation

Address

email

## 1 Details for Reproducibility

**Protocols.** Here we present more details of the *overlapped* and *disjoint* settings. Specifically, the *overlapped* setting means pixels in samples from  $\mathcal{D}_t$  can belong to any classes, including past (step 1 to  $t - 1$ ), now (step  $t$ ) and future (step  $t + 1$  to  $T$ ). Note that only the classes in  $\mathcal{C}_t$  would be annotated in  $\mathcal{Y}_t$ . Besides, images with multiple classes would appear in several learning steps, with different annotations. The *disjoint* setting, studied by [1, 10], has a non-overlapped  $\{\mathcal{D}_t\}$ . Thus,  $\mathcal{D}_i \cap \mathcal{D}_j = \{\emptyset\}$  when  $i \neq j$ . It is obvious that *overlapped* setup is more realistic, because *overlapped* has a weaker restriction on data than *disjoint*.

**Implementation details.** Following the common practice [1, 10, 2], we use DeepLabv3 [3] and ResNet-101 [6] pretrained on ImageNet as the segmentation network, and the output stride is 16. We train the network using the SGD with a learning rate of  $10^{-2}$  on Pascal VOC2012, and  $5 \times 10^{-3}$  for all steps on ADE20K. The momentum and weight decay are 0.9 and  $10^{-4}$  on both datasets. The batch size is 16 for Pascal VOC 2012, and 12 for ADE20K. Data augmentation [4] is applied to all the images. As mentioned in the main paper, MicroSeg-M is an advanced version of MicroSeg by introducing memory sampling strategy from [2]. To be more specific, the strategy is based on random-sampling, and advanced ensuring that there is at least one sample of every seen class in the memory. Code is available at <https://anonymous.4open.science/r/MicroSeg-F1A3>.

**Baselines.** Besides comparing with prior methods, we also provides the experimental results of *joint* training, *i.e.*, training all classes offline. This setting is usually regarded as an upper bound of corresponding incremental scenario [1, 8].

## 2 More Experimental Results and Discussions

**Detailed experimental results.** Tab. 1 provides experimental results of Pascal VOC 2012 [5] of different incremental scenarios with each class.

**Experimental results of disjoint setup.** As explained in Sec. 1, disjoint setup is not realistic due to its non-overlapping samples in each learning step. However, we still provide experimental results of the disjoint setup, for a fair comparison with prior works [1, 10, 4, 2]. The result of Tab. 2 shows that our proposed methods, *i.e.*, MicroSeg and MicroSeg-M, outperform the state-of-the-art methods.

**Further discussion of the proposal.** To further investigate the effect of the proposal, we conducted experiments with modified SSUL [2] (a prior work of CISS). Specifically, SSUL performs the mining of the background by using saliency map [7] as a *saliency detector*, to extract unknown class from background. We complete the experiments on replacing the saliency map with saliency proposal

Table 1: Detailed experimental results of Pascal VOC 2012 with class.

|                        | bg   | aero | bike | bird | boat | bottle | bus  | car  | cat  | chair | cow  | table | dog  | horse | mbike | person | plant | sheep | sofa | train | TV   | mIoU |
|------------------------|------|------|------|------|------|--------|------|------|------|-------|------|-------|------|-------|-------|--------|-------|-------|------|-------|------|------|
| <b>10-1 (11 tasks)</b> |      |      |      |      |      |        |      |      |      |       |      |       |      |       |       |        |       |       |      |       |      |      |
| MicroSeg               | 89.7 | 91.6 | 41.2 | 95.1 | 74.1 | 84.4   | 90.3 | 89.6 | 86.8 | 37.4  | 18.6 | 33.4  | 75.1 | 38.5  | 76.6  | 87.9   | 15.7  | 34.1  | 28.5 | 60.0  | 37.0 | 61.2 |
| MicroSeg-M             | 90.9 | 86.8 | 42.0 | 91.5 | 78.0 | 84.0   | 90.9 | 87.6 | 89.3 | 40.1  | 68.8 | 47.5  | 69.4 | 40.4  | 84.9  | 85.7   | 34.0  | 45.2  | 33.6 | 70.8  | 61.6 | 67.8 |
| <b>2-2 (10 tasks)</b>  |      |      |      |      |      |        |      |      |      |       |      |       |      |       |       |        |       |       |      |       |      |      |
| MicroSeg               | 85.7 | 73.9 | 24.4 | 40.8 | 25.9 | 48.8   | 27.7 | 74.9 | 48.0 | 4.7   | 39.3 | 5.1   | 54.8 | 44.5  | 67.1  | 80.5   | 11.8  | 38.0  | 27.0 | 45.2  | 47.0 | 43.5 |
| MicroSeg-M             | 87.2 | 72.8 | 20.2 | 39.2 | 34.2 | 59.1   | 79.5 | 82.1 | 78.3 | 6.6   | 35.3 | 13.5  | 69.4 | 47.9  | 69.7  | 80.1   | 25.9  | 56.0  | 28.1 | 70.5  | 41.0 | 52.2 |
| <b>15-1 (6 tasks)</b>  |      |      |      |      |      |        |      |      |      |       |      |       |      |       |       |        |       |       |      |       |      |      |
| MicroSeg               | 89.8 | 92.9 | 44.4 | 95.5 | 76.0 | 82.8   | 92.9 | 90.9 | 93.4 | 48.6  | 68.2 | 52.9  | 89.8 | 83.5  | 89.7  | 90.4   | 11.7  | 56.2  | 24.8 | 57.3  | 34.2 | 69.8 |
| MicroSeg-M             | 91.2 | 93.2 | 43.4 | 93.1 | 78.7 | 84.7   | 91.9 | 91.0 | 94.3 | 45.8  | 88.4 | 56.0  | 88.5 | 84.6  | 86.9  | 90.1   | 22.9  | 71.5  | 31.0 | 71.5  | 65.6 | 74.4 |
| <b>5-3 (6 tasks)</b>   |      |      |      |      |      |        |      |      |      |       |      |       |      |       |       |        |       |       |      |       |      |      |
| MicroSeg               | 89.1 | 91.2 | 34.8 | 89.3 | 73.9 | 87.3   | 82.3 | 83.6 | 79.6 | 4.6   | 55.5 | 40.0  | 76.6 | 55.5  | 74.1  | 87.9   | 31.2  | 51.4  | 30.5 | 70.2  | 62.7 | 64.3 |
| MicroSeg-M             | 90.9 | 81.2 | 34.7 | 87.8 | 67.4 | 87.0   | 85.0 | 78.2 | 80.6 | 21.8  | 55.1 | 37.9  | 77.3 | 52.9  | 74.5  | 86.2   | 43.4  | 38.8  | 33.8 | 74.8  | 67.0 | 64.6 |
| <b>19-1 (2 tasks)</b>  |      |      |      |      |      |        |      |      |      |       |      |       |      |       |       |        |       |       |      |       |      |      |
| MicroSeg               | 88.8 | 87.5 | 41.4 | 92.5 | 72.6 | 85.3   | 96.0 | 85.6 | 94.9 | 36.6  | 92.4 | 57.6  | 90.9 | 89.6  | 85.0  | 89.9   | 71.6  | 82.2  | 50.4 | 87.0  | 13.9 | 75.7 |
| MicroSeg-M             | 93.6 | 86.8 | 43.7 | 87.5 | 73.3 | 84.0   | 96.1 | 90.5 | 93.8 | 37.3  | 87.8 | 62.9  | 90.4 | 88.6  | 88.6  | 89.9   | 71.0  | 83.0  | 51.5 | 85.9  | 62.9 | 78.5 |
| <b>15-5 (2 tasks)</b>  |      |      |      |      |      |        |      |      |      |       |      |       |      |       |       |        |       |       |      |       |      |      |
| MicroSeg               | 91.7 | 91.1 | 44.8 | 92.4 | 80.1 | 85.2   | 93.3 | 91.3 | 94.5 | 43.0  | 69.3 | 55.9  | 90.5 | 83.9  | 90.1  | 90.1   | 32.3  | 62.3  | 30.6 | 82.0  | 57.0 | 73.8 |
| MicroSeg-M             | 93.0 | 91.5 | 42.9 | 94.0 | 80.1 | 85.4   | 92.2 | 91.8 | 94.7 | 44.5  | 89.5 | 55.2  | 90.1 | 87.8  | 90.3  | 90.5   | 48.0  | 76.5  | 36.1 | 77.6  | 58.0 | 76.6 |

Table 2: Experimental results on Pascal VOC 2012 for *disjoint* setup.

| Method            | VOC 15-1 (6 tasks) |             |             | VOC 19-1 (2 tasks) |             |             | VOC 15-5 (2 tasks) |             |             |
|-------------------|--------------------|-------------|-------------|--------------------|-------------|-------------|--------------------|-------------|-------------|
|                   | 0-15               | 16-20       | all         | 0-19               | 20          | all         | 0-15               | 16-20       | all         |
| LwF-MC [8]        | 4.5                | 7.0         | 5.2         | 63.0               | 13.2        | 60.5        | 67.2               | 41.2        | 60.7        |
| ILT [9]           | 3.7                | 5.7         | 4.2         | 69.1               | 16.4        | 66.4        | 63.2               | 39.5        | 57.3        |
| MiB [1]           | 46.2               | 12.9        | 37.9        | 69.6               | 25.6        | 67.4        | 71.8               | 43.3        | 64.7        |
| SDR [10]          | 59.4               | 14.3        | 48.7        | 70.8               | 31.4        | 68.9        | 74.6               | 44.1        | 67.3        |
| PLOP [4]          | 57.9               | 13.7        | 46.5        | 75.4               | 38.9        | 73.6        | 71.0               | 42.8        | 64.3        |
| SSUL [2]          | 74.0               | 32.2        | 64.0        | 77.4               | 22.4        | 74.8        | 76.4               | 45.6        | 69.1        |
| SSUL-M [2]        | 76.5               | 43.4        | 68.6        | 77.6               | 43.9        | 76.0        | 76.5               | 48.6        | 69.8        |
| MicroSeg (Ours)   | 73.7               | 24.1        | 61.9        | 80.6               | 16.0        | 77.4        | 77.4               | 43.4        | 69.3        |
| MicroSeg-M (Ours) | <b>80.0</b>        | <b>47.6</b> | <b>72.3</b> | <b>81.1</b>        | <b>45.1</b> | <b>79.4</b> | <b>80.7</b>        | <b>55.2</b> | <b>74.7</b> |
| Joint             | 82.7               | 75.0        | 80.9        | 81.0               | 79.1        | 80.9        | 82.7               | 75.0        | 80.9        |

Table 3: Experimental results of SSUL, using different saliency detector. Each row denotes a saliency detector type that SSUL applies: saliency map, saliency proposal and ground truth. The row *saliency map* represents the results of original settings of SSUL. And the following two rows shows the results of SSUL with modified saliency detector. We provide the experimental results of VOC 15-1 and VOC 19-1.

| setting  | VOC 15-1 (6 tasks) |       |      | VOC 19-1 (2 tasks) |      |      |
|----------|--------------------|-------|------|--------------------|------|------|
|          | 0-15               | 16-20 | all  | 0-19               | 20   | all  |
| saliency | 77.3               | 36.6  | 67.6 | 77.7               | 29.7 | 75.4 |
| proposal | 76.5               | 38.8  | 67.5 | 78.6               | 35.0 | 76.6 |
| GT       | 76.9               | 46.0  | 69.7 | 79.4               | 65.1 | 78.8 |

and ground truth. The qualitative analysis of these three kinds of saliency detectors is shown in Fig. 1. What can be observed is, saliency map only focuses on the most significant areas of the image (*people*), while some areas are missed (*bottle*), proposal tends to focus on more area (*plants*), as the area circled in the Fig. 1. The ground truth (GT), on the other hand, figures out exactly the area that needs to be segmented. Therefore, GT can be considered as the upper bound of quality of the saliency map, because it has complete and precise foreground annotation.

We provide experimental results of VOC 15-1 and VOC 19-1 scenarios in Tab. 3. From the results we can observe that, compared with saliency map, GT can significantly improve the performance of SSUL, while proposal can only slightly improve it. As a saliency detector, *proposal* does not work well compared to *saliency map*. It indicates that the performance improvement of our method comes from neither the information contained in proposal, nor its positive impact on the performance of semantic segmentation only. The key of our proposed method is proposals with the Micro mechanism, trying to solve the problem of background shift in incremental learning.

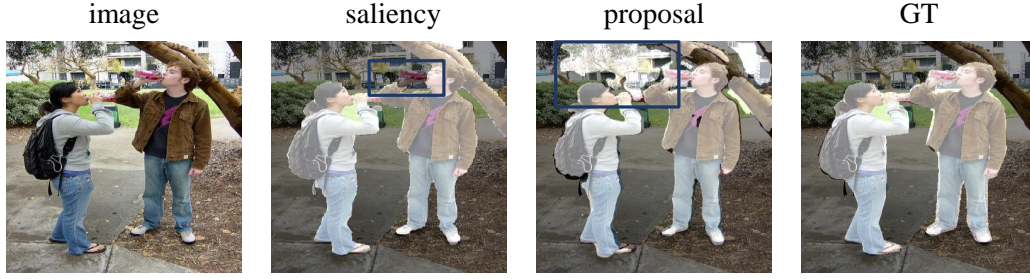

Figure 1: Qualitative comparison of different saliency detector. The boxes point out the main differences among them.

### 3 More Qualitative Results

#### 3.1 Qualitative analysis of the Micro mechanism

Fig. 2 shows the qualitative results of the proposed Micro mechanism. For the ‘cluster’ column, distinct colors denotes different clusters of *unseen class*, i.e.,  $c_{\hat{u},k}$  motioned in the main paper. It can be seen from the figure, the background of samples are clustered well and reasonably with the Micro mechanism. The mining of the unseen class not only mitigates the impact of the historical knowledge issue, but also benefits learning new concepts.

#### 3.2 Qualitative analysis of ADE20K

Fig. 3 shows the qualitative results of the proposed MicroSeg on ADE20K dataset [11] with the 100-10 scenario. Overall, our method performs well in CISS on ADE20K dataset. The first two rows show the ability of the MicroSeg of learning new concepts (*dishwasher* is learned at step 4 and *fan* is learned at step 5). The following two rows show the stability of our method. With the learning step increasing, MicroSeg performs stable predictions. Historical knowledge is not forgotten when learning new concepts. Moreover, for ADE20K, a dense-labeled dataset, both thing and stuff classes are annotated. Our method shows good performance at segmenting samples with only stuff classes, e.g., *sky*, *grassland*, *lake*, as shown in the last two rows.

#### 3.3 Extra qualitative results of MicroSeg

We provide extra qualitative results of ADE20K 100-10 and VOC 15-1 in Fig.4 and Fig. 5.

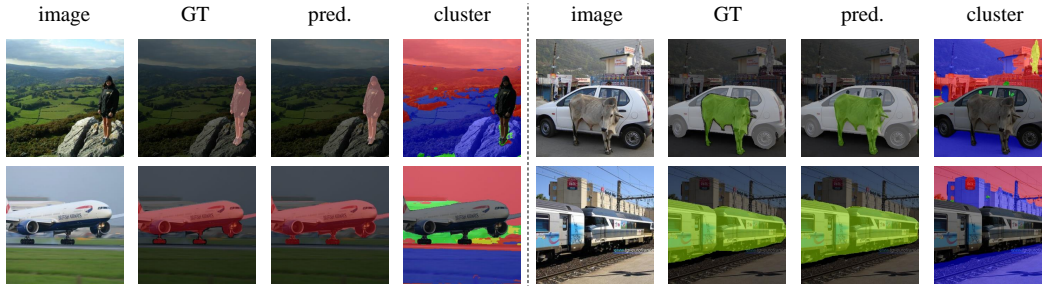

Figure 2: Qualitative performance of the proposed Micro mechanism. The first and second columns are samples and ground truth. The third column shows the predictions of the last learning step. For the last column, distinct colors denotes different clusters of *unseen class*, i.e.,  $c_{\hat{u},k}$  mentioned in main paper.

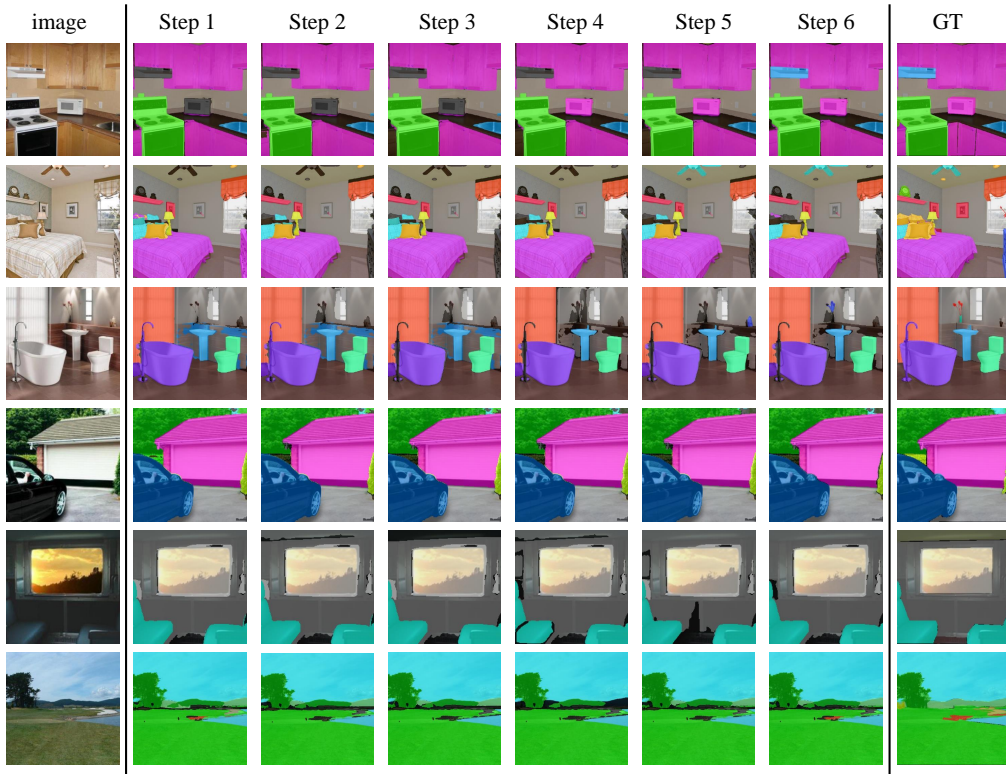

Figure 3: Qualitative results on the ADE20K dataset with the 100-10 scenario.

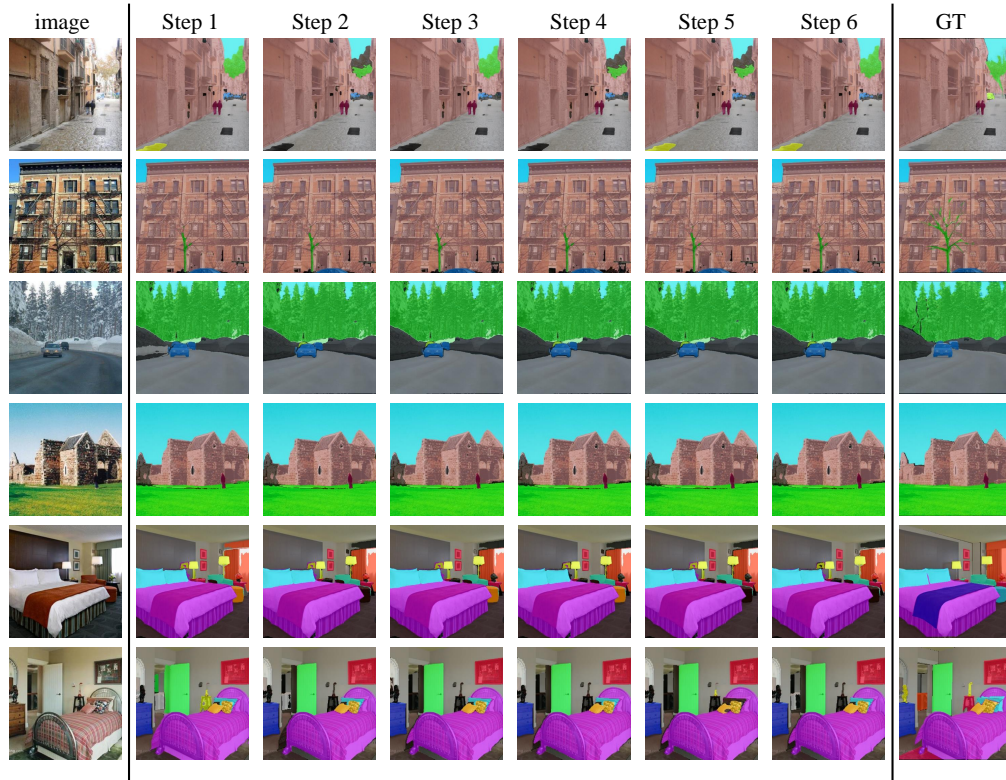

Figure 4: Extra qualitative results of ADE20K

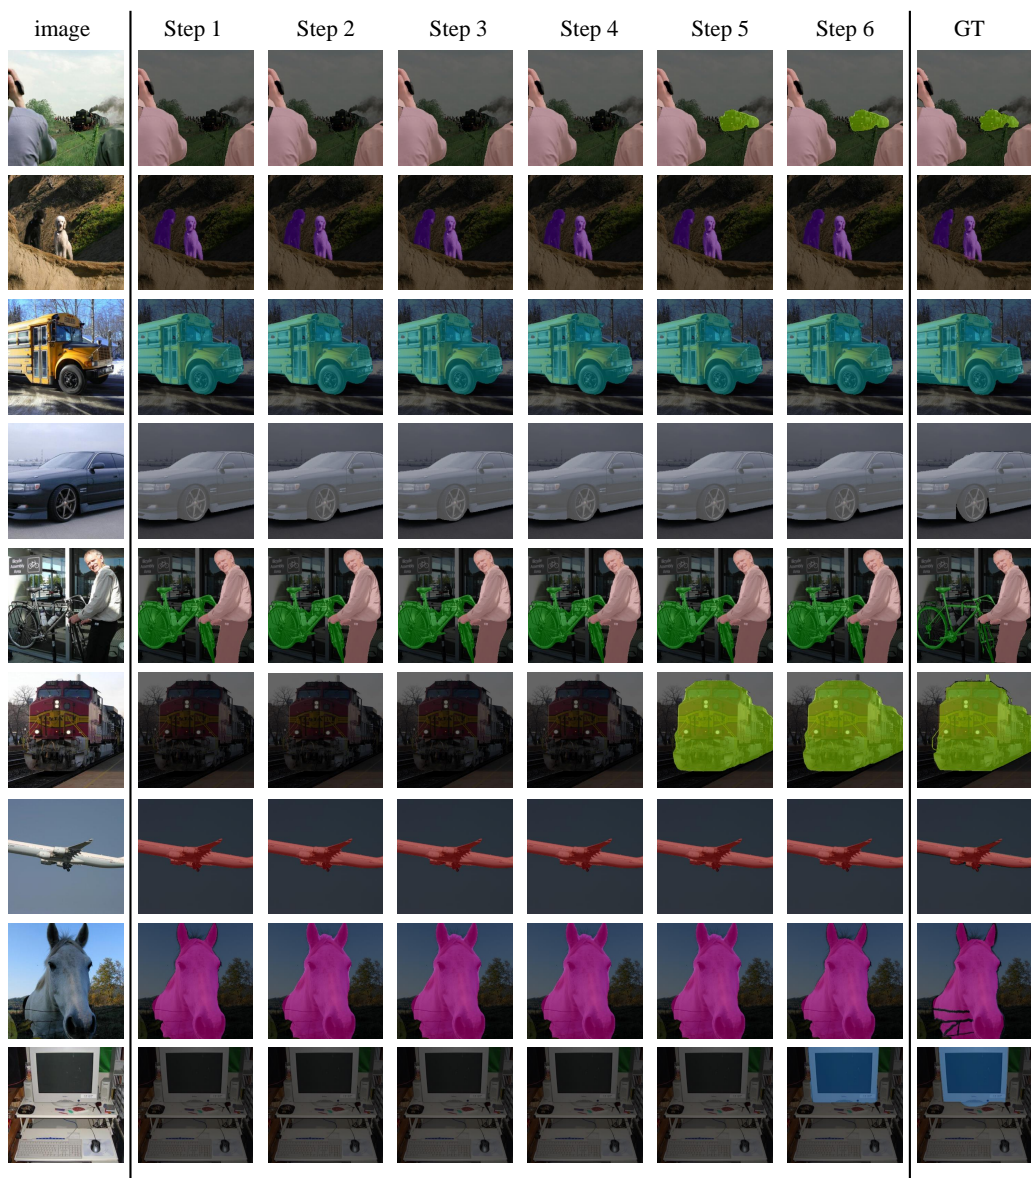

Figure 5: Extra qualitative results of Pascal VOC 2012.

## References

- [1] Fabio Cermelli, Massimiliano Mancini, Samuel Rota Bulo, Elisa Ricci, and Barbara Caputo. Modeling the background for incremental learning in semantic segmentation. In *Proc. IEEE Conference on Computer Vision and Pattern Recognition*, pages 9233–9242, 2020.
- [2] Sungmin Cha, YoungJoon Yoo, Taesup Moon, et al. Ssul: Semantic segmentation with unknown label for exemplar-based class-incremental learning. *Advances in neural information processing systems*, 34, 2021.
- [3] Liang-Chieh Chen, George Papandreou, Iasonas Kokkinos, Kevin Murphy, and Alan L Yuille. Deeplab: Semantic image segmentation with deep convolutional nets, atrous convolution, and fully connected crfs. *IEEE Transactions on Pattern Recognition and Machine Intelligence*, 40(4):834–848, 2017.
- [4] Arthur Douillard, Yifu Chen, Arnaud Dapogny, and Matthieu Cord. Plop: Learning without forgetting for continual semantic segmentation. In *Proc. IEEE Conference on Computer Vision and Pattern Recognition*, pages 4040–4050, 2021.
- [5] Mark Everingham, Luc Van Gool, Christopher KI Williams, John Winn, and Andrew Zisserman. The pascal visual object classes (voc) challenge. *International Journal on Computer Vision*, 88(2):303–338, 2010.
- [6] Kaiming He, Xiangyu Zhang, Shaoqing Ren, and Jian Sun. Deep residual learning for image recognition. In *Proc. IEEE Conference on Computer Vision and Pattern Recognition*, pages 770–778, 2016.
- [7] Huaizu Jiang, Jingdong Wang, Zejian Yuan, Yang Wu, Nanning Zheng, and Shipeng Li. Salient object detection: A discriminative regional feature integration approach. In *Proc. IEEE Conference on Computer Vision and Pattern Recognition*, pages 2083–2090, 2013.
- [8] Zhizhong Li and Derek Hoiem. Learning without forgetting. *IEEE Transactions on Pattern Recognition and Machine Intelligence*, 40(12):2935–2947, 2017.
- [9] Umberto Michieli and Pietro Zanuttigh. Incremental learning techniques for semantic segmentation. In *Proc. IEEE International Conference on Computer Vision Workshops*, pages 0–0, 2019.
- [10] Umberto Michieli and Pietro Zanuttigh. Continual semantic segmentation via repulsion-attraction of sparse and disentangled latent representations. In *Proc. IEEE Conference on Computer Vision and Pattern Recognition*, pages 1114–1124, 2021.
- [11] Bolei Zhou, Hang Zhao, Xavier Puig, Sanja Fidler, Adela Barriuso, and Antonio Torralba. Scene parsing through ade20k dataset. In *Proc. IEEE Conference on Computer Vision and Pattern Recognition*, pages 633–641, 2017.
